# Supplementary material for: Panchromatic squaraine compounds for broad band light harvesting electronic devices
Source: Royal Society of Chemistry journal article supplement (doi:10.1039/c2jm16240g), 2012-01-01
Supplement: c2jm16240g.pdf [file c2jm16240g.pdf]

# Panchromatic Squaraine Compounds for Broad Band Organic Photodetectors

Maddalena Binda,<sup>a</sup> Dario Natali,<sup>a</sup> Marco Sampietro,<sup>a</sup> Elisabetta ronchi,<sup>b</sup> Riccardo Ruffo,<sup>b</sup> Matteo Salamone<sup>b</sup> and Luca Beverina<sup>b\*</sup>

Supporting information

1. <sup>1</sup>H NMR spectrum of derivative 8
2. <sup>13</sup>C NMR spectrum of derivative 8
3. <sup>1</sup>H NMR spectrum of derivative 10
4. <sup>13</sup>C NMR spectrum of derivative 10
5. <sup>1</sup>H NMR spectrum of derivative sq-CN
6. <sup>13</sup>C NMR spectrum of derivative sq-CN
7. <sup>1</sup>H NMR spectrum of derivative sq-PY
8. <sup>13</sup>C NMR spectrum of derivative sq-PY

### 1. $^1\text{H}$ NMR spectrum of derivative 8

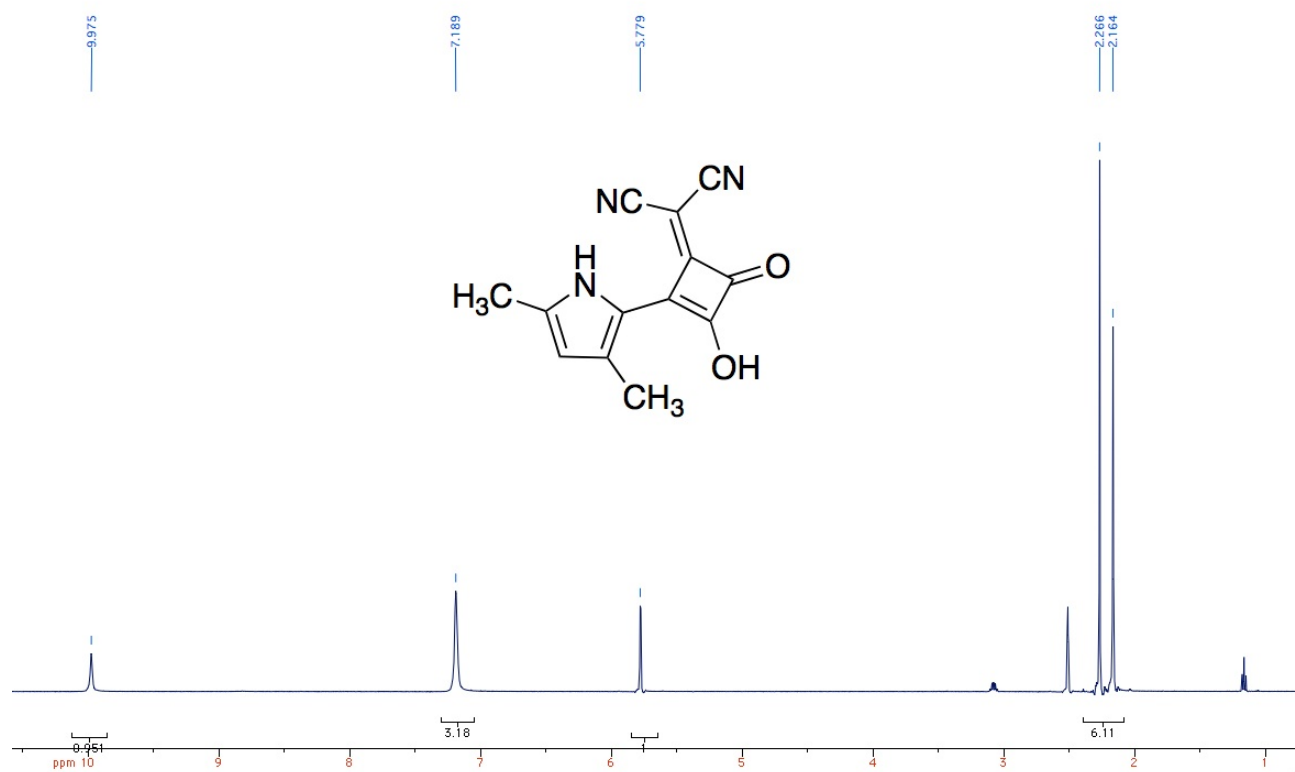

## 2. $^{13}\text{C}$ NMR spectrum of derivative 8

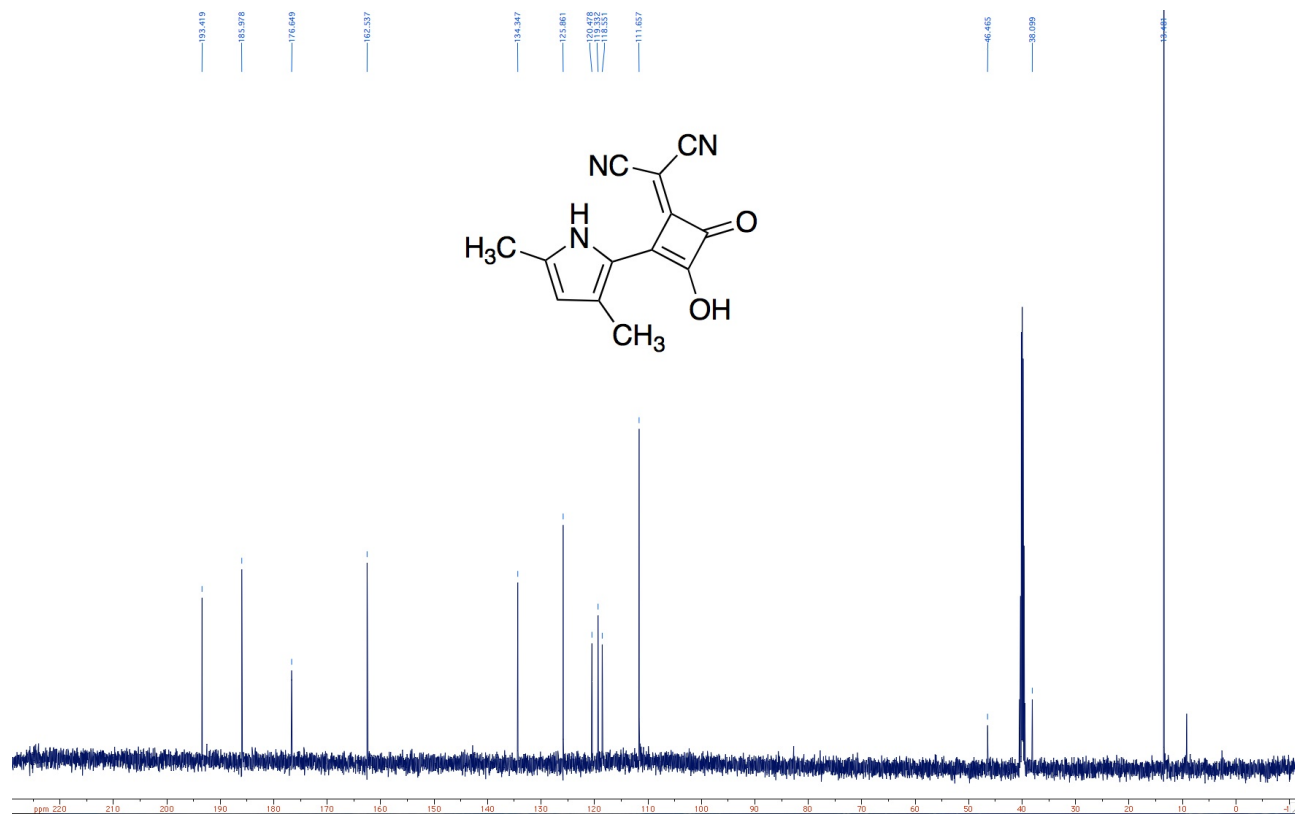

### 3. <sup>1</sup>H NMR spectrum of derivative 10

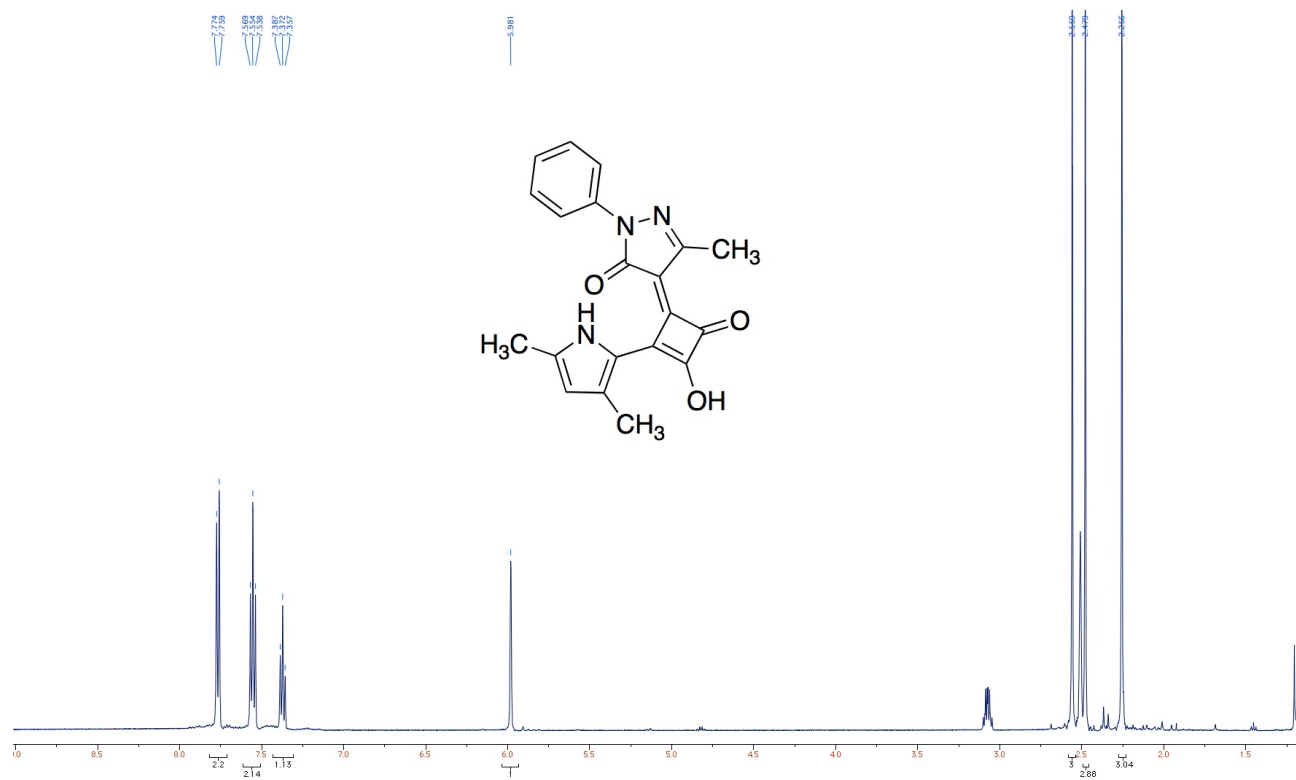

#### 4. $^{13}\text{C}$ NMR spectrum of derivative 10

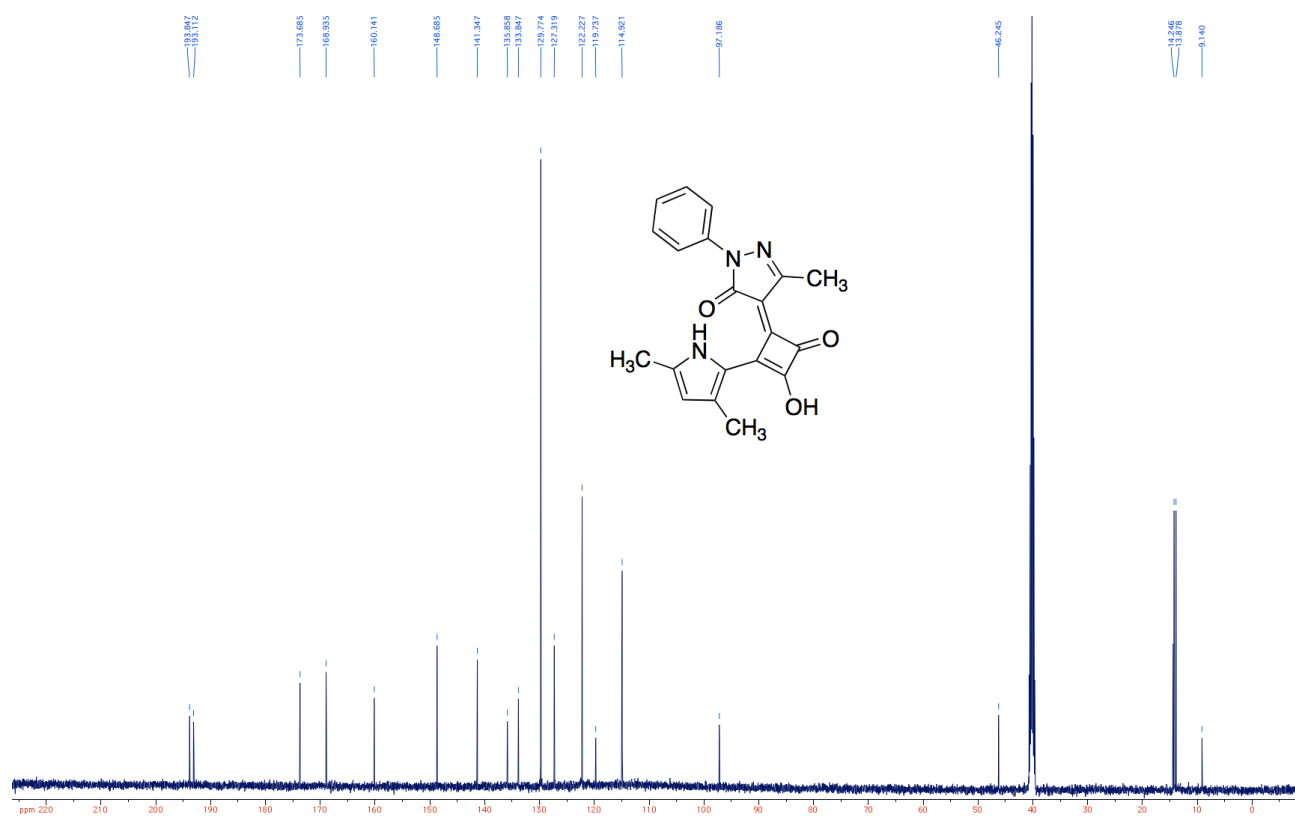

## 5. <sup>1</sup>H NMR spectrum of derivative sq-CN

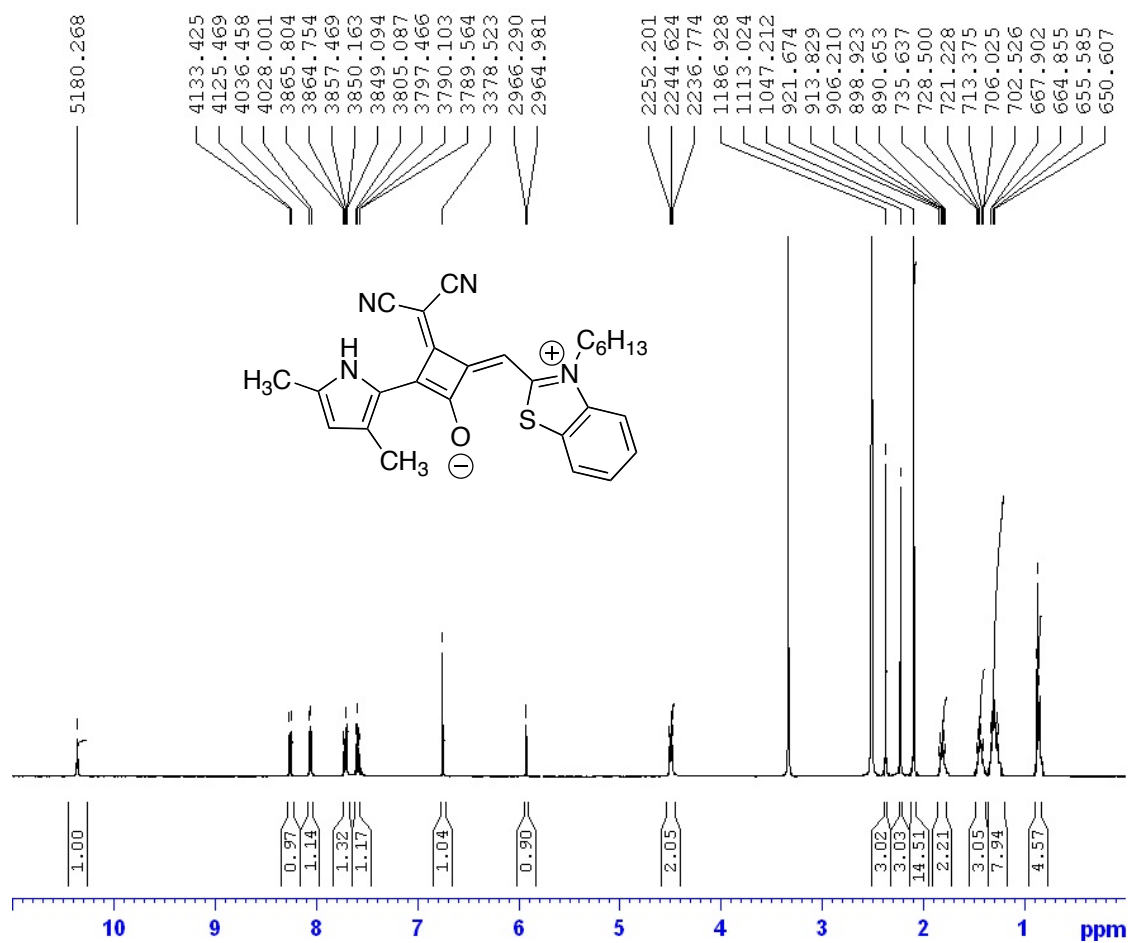

## 6. $^{13}\text{C}$ NMR spectrum of derivative sq-CN

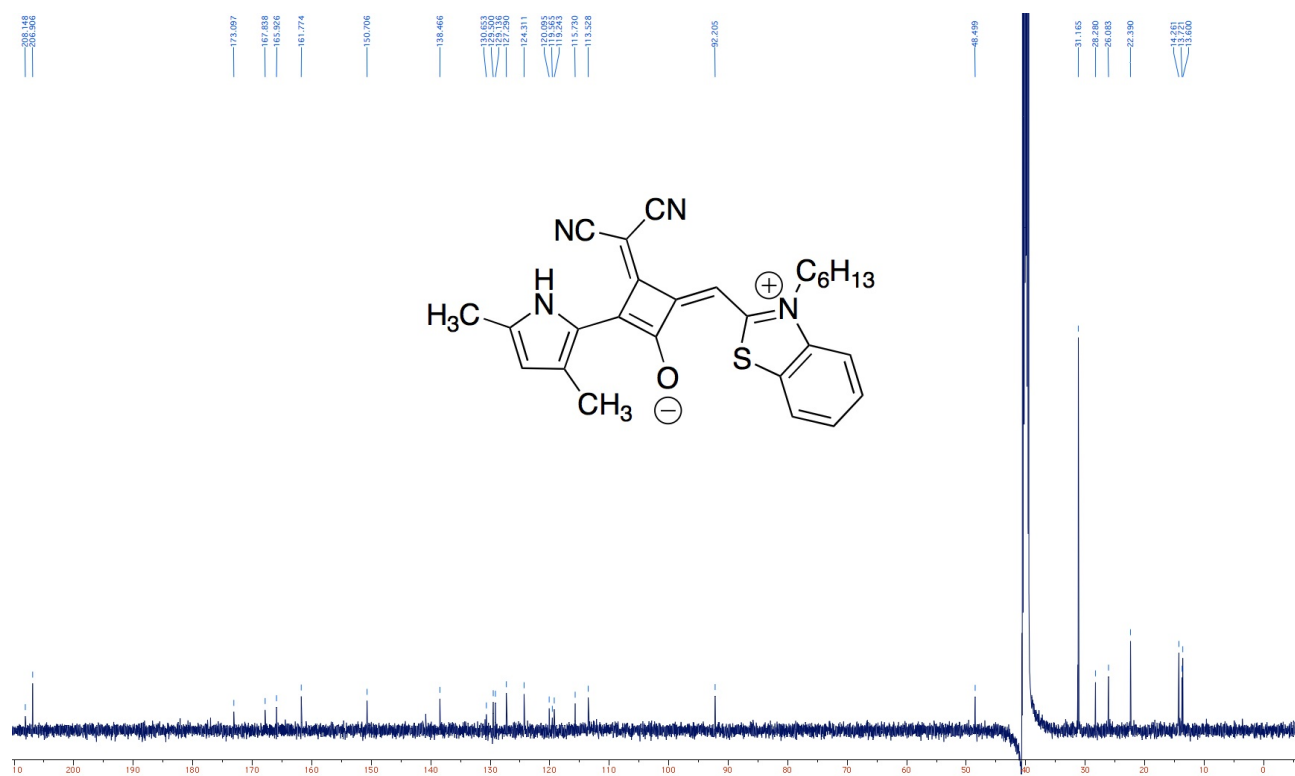

## 7. <sup>1</sup>H NMR spectrum of derivative sq-Py

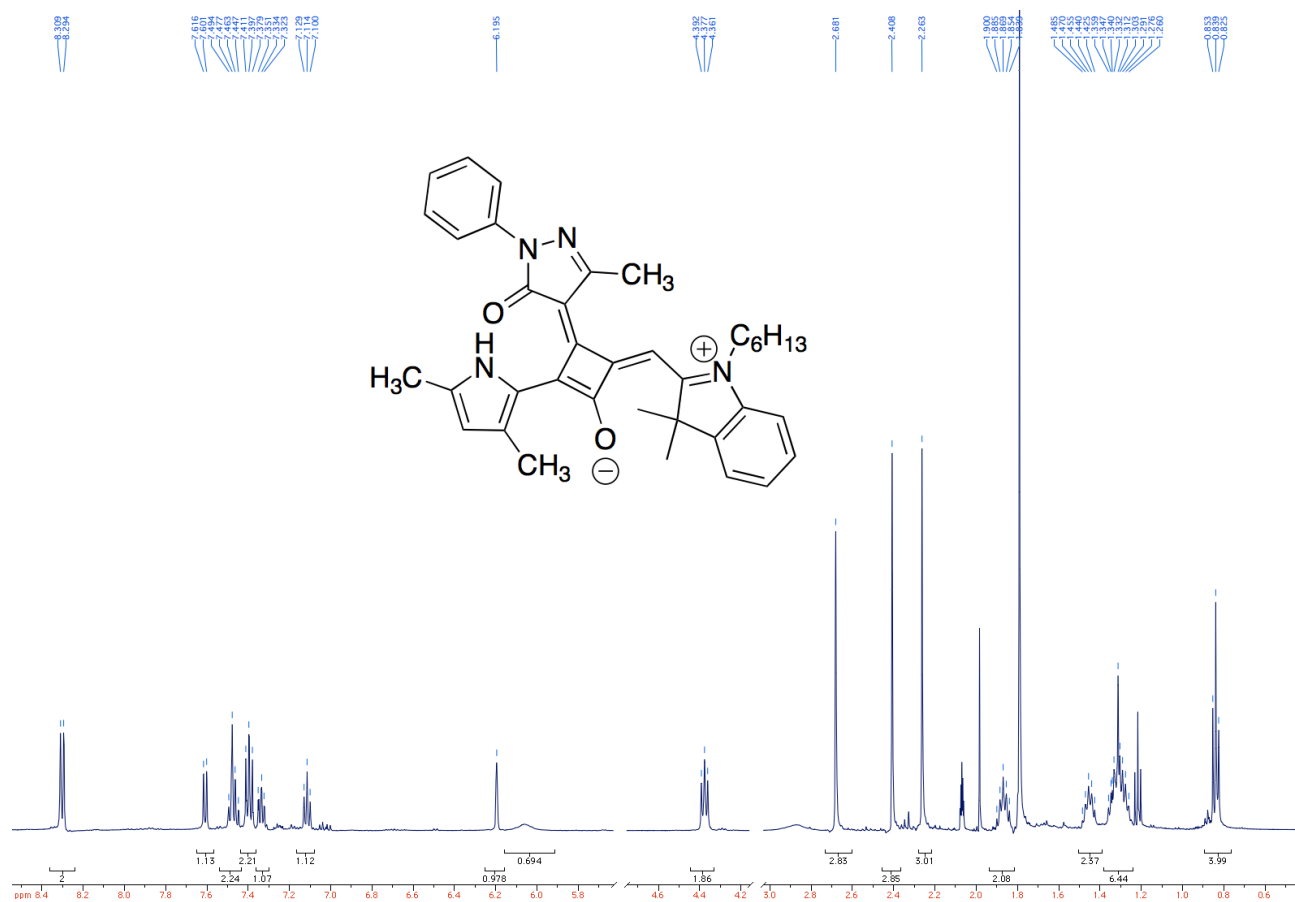



## 8. $^{13}\text{C}$ NMR spectrum of derivative sq-PY

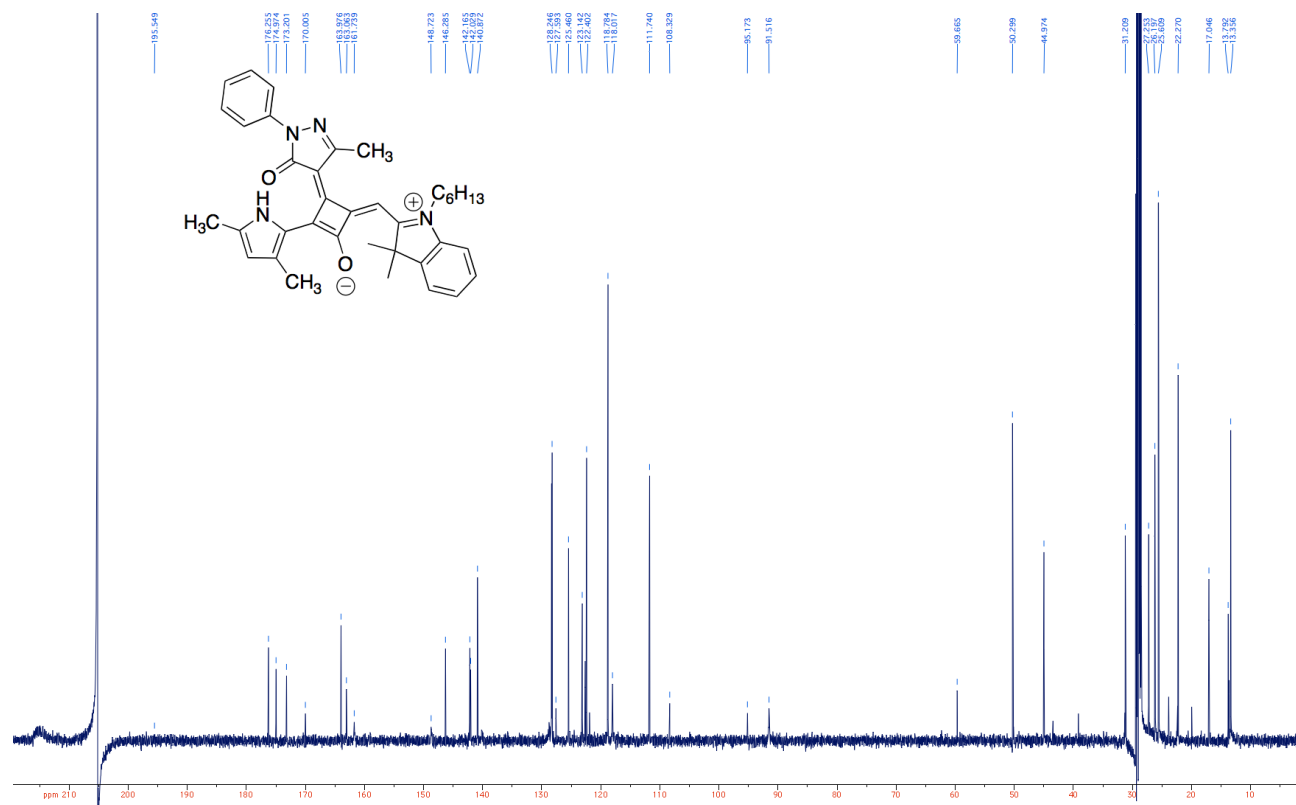

193.549

178.255

174.974

173.201

170.005

163.976

161.739

148.723

146.285

142.195

140.872

128.246

127.460

123.142

118.077

111.740

108.329

95.173

91.316

59.665

50.789

44.974

31.729

26.137

25.609

22.270

17.046

13.326
